# Supplementary material
Source: MDPI journal article supplement (https://www.mdpi.com/2673-4141/4/1/2)
Supplement: s1 [file s1]

Archive with 3 entries (3 files):
- bipydiol.35.mpg
- bipydiol.36.mpg
- Supplementary Figures.pdf
